# Supplementary material for: The avifauna of Ramanathapuram, Tamil Nadu along the Southeast coast of India: waterbird assessments and conservation implications across key sanctuaries and Ramsar sites
Source: PeerJ. 2025 Feb 25;13:e18899. doi: 10.7717/peerj.18899 (PMC11869888; doi:10.7717/peerj.18899)
Supplement: Supplemental Information 1 — 1) Breeding Waterbirds; 2) Percentage of Occurrence; 3) Feeding guild; 4) Indices. [file peerj-13-18899-s001.xlsx]

## Sheet: Chitrangudi
Breeding Waterbirds
	Nov	Dec	Jan	Feb		Total
Painted Stork	6	14	16	12		48
Asian Open-billed Stork	21	24	25	23		93
Black-headed Ibis	15	18	18	17		68
Glossy Ibis	0	3	3	3		9
Little Egret	7	9	8	8		32
Intermediate Egret	4	3	3	3		13
Large Egret	3	5	5	5		18
Grey Heron	7	7	7	5		26
Pond Heron	5	5	5	5		20
Black crowned Night Heron	17	16	18	18		69
Purple Heron	2	2	2	2		8
Little cormorant	9	8	8	7		32
Oriental Darter	0	2	2	2		6

## Sheet: Kanjiramkulam
Breeding Waterbirds
	Nov	Dec	Jan	Feb		Total
Painted Stork	6	14	16	12		48
Asian Open-billed Stork	21	24	25	23		93
Black-headed Ibis	15	18	18	17		68
Intermediate Egret	7	9	8	8		32
Large Egret	4	3	3	3		13
Grey Heron	4	4	4	4		16
Pond Heron	2	3	3	3		11
Black crowned Night Heron	3	5	5	5		18
Purple Heron	1	2	2	2		7
Little cormorant	5	6	6	6		23
Indian Cormorant	5	5	5	5		20
Spot-billed Pelican	8	15	15	16		54
Spot-billed Duck	0	0	7	7		14
Knob-billed Duck	0	0	12	9		21

## Sheet: Mel-Kel Selvanoor 
Breeding Waterbirds
	Nov	Dec	Jan	Feb		Total
Painted Stork	21	22	22	22		87
Asian Open-billed Stork	21	24	25	23		93
Black-headed Ibis	15	18	18	17		68
Glossy Ibis	1	1	1	1		4
Little Egret	6	8	8	8		30
Intermediate Egret	7	9	8	8		32
Large Egret	4	3	3	3		13
Cattle Egret	2	2	2	2		8
Grey Heron	4	4	4	4		16
Pond Heron	2	3	3	3		11
Black crowned Night Heron	3	5	5	5		18
Purple Heron	1	2	2	2		7
Little cormorant	5	6	6	6		23
Indian Cormorant	5	5	5	5		20
Oriental Darter	2	2	2	2		8
Spot-billed Pelican	8	15	15	16		54
Spot-billed Duck	1	1	1	1		4
Black-winged Stilt	2	2	2	2		8
Eurasian spoonbill	2	3	3	3		11

## Sheet: Sakkarakottai
Breeding Waterbirds
	Oct	Nov	Dec	Jan	Feb		Total
Asian Open-billed Stork	48	28	23	85	113		297
Black-headed Ibis	28	17	25	42	85		197
Grey Heron	17	7	7	21	21		73
Black crowned Night Heron	32	28	42	48	36		186
Little cormorant	130	124	210	320	310		1094
Oriental Darter	7	6	8	14	18		53
Spot-billed Pelican	18		18	42	51		129
Spot-billed Duck	23	19	23	25	25		115
Lesser Whistling Duck	0	0	0	14	21		35
Knob-billed Duck	16	3	7	20	28		74
Little Grebe	38	12	38	23	38		149
Red wattled Lapwing	18	17	13	27	32		107
Black-winged Stilt	0	0	0	32	38		70
Common Moorhen	25	18	21	29	37		130
Pheasant tailed Jacana	12	8	3	9	12		44
Purple Swamphen	34	14	12	42	39		141
White breasted waterhen	7	8	2	12	12		41

## Sheet:  Therthangal
Breeding waterbirds
	Sept	Oct	Nov	Dec	Jan	Feb		Total
Painted Stork	30	32	32	60	61	60		275
Asian Open-billed Stork	120	264	258	220	180	140		1182
Black-headed Ibis	21	72	72	45	40	22		272
Glossy Ibis	0	2	12	10	5	0		29
Red-naped Ibis	0	0	2	2	2	2		8
Little Egret	2	6	8	6	2	1		25
Intermediate Egret	1	5	11	11	8	4		40
Great Egret	0	2	8	8	6	0		24
Cattle Egret	12	18	18	16	12	10		86
Grey Heron	0	0	15	15	8	4		42
Black crowned Night Heron	16	30	36	41	38	35		196
Purple Heron	0	2	5	2	2	0		11
Pond Heron	3	10	11	9	8	2		43
Little Cormorant	5	20	35	65	65	15		205
Indian Cormorant	15	38	45	42	12	2		154
Oriental Darter	2	5	20	30	26	15		98
Spot-billed Pelican	20	120	182	182	110	52		666
Spot-billed Duck	0	0	0	4	4	0		8
Lesser Whislting Duck	0	0	0	1	1	0		2
Knob-billed Duck	0	0	0	2	2	0		4
Red wattled Lapwing	0	0	2	2	0	0		4
Black-winged Stilt	0	0	4	4	0	0		8
Eurasian Spoonbill	0	6	12	8	6	0		32

## Sheet: % of occurence
	Common name	Bird Sanctuaries
		CBS	KBS	MKBS	SBS	TBS	No. sites recorded	% of sites
	Spot billed Pelican	-	+	+	+	+	4	80
	Oriental Darter	+	-	+	+	+	4	80
	Large egret	+	+	+	-	+	4	80
	Intermediate Egret	+	+	+	-	+	4	80
	Little Egret	+	-	+	-	+	3	60
	Cattle Egret	-	-	+	-	+	2	40
	Grey Heron	+	+	+	+	+	5	100
	Indian Pond Heron	+	+	+	-	+	4	80
	Black-crowned Night Heron	+	+	+	+	+	5	100
	Purple Heron	+	+	+	+	+	5	100
	Painted Stork	+	+	+	-	+	4	80
	Openbill Stork	+	+	+	+	+	5	100
	Glossy Ibis	+	-	+	+	+	4	80
	Red-naped Ibis	-	-	-	-	+	1	20
	Black-headed Ibis	+	+	+	+	+	5	100
	Eurasian Spoonbill	-	-	+	-	+	2	40
	Spot-billed Duck	-	+	+	+	+	4	80
	Lesser Whistling Duck	-	-	-	+	+	2	40
	Knob billed Duck	-	+	-	+	+	3	60
	Little cormorant	+	+	+	+	+	5	100
	Indian cormorant	-	+	+	-	+	3	60
	Black winged Stilt	-	-	+	+	+	3	60
	Red wattled Lapwing	-	-	-	+	+	2	40
	Common Moorhen	-	-	-	+	-	1	20
	Pheasant tailed Jacana	-	-	-	+	-	1	20
	Purple Swamphen	-	-	-	+	-	1	20
	White breasted waterhen	-	-	-	+	-	1	20
	Little Grebe	-	-	-	+	-	1	20

## Sheet: Feeding guild
			Common name	FG	Habitat		Feeding guild				Habitat
		Pavo cristatus	Indian Peafowl	O	AL/OS			Number of species	%			Number of species	%
		Francolinus pondicerianus	Grey Francolin	G	GL/OS		carnivore	49	37.4046		AL	35	26.7176
		Anas Penelope	Eurasian Wigeon	O	WL		frugivore	6	4.58015		GL	28	21.374
		Anas crecca	Common Teal	O	WL		Granivore	10	7.63359		OS	54	41.2214
		Anas acuta	Northern Pintail	O	WL		Insectivorous	42	32.0611		Tr	14	10.687
		Sarkidiornis melanolos	Knob-billed Duck	O	WL		Nectarivorous	4	3.05344		WL	67	51.145
		Anas poecilorhyncha	Indian Spot-billed Duck	O	WL		Omnivore	20	15.2672
		Spatula querquedula	Garganey	O	WL
		Anser indicus	Bar headed Goose	O	WL
		Dendrocygna javanica	Lesser Whistling-Duck	O	WL
		Spatula clypeata	Northern Shoveler	O	WL
		Tachybaptus ruficollis	Little Grebe	C	WL
		Dinopium benghalense	Black-rumped Flameback	I	Tr
		Psilopogon haemacephalus	Coppersmith Barbet	F	Tr
		Upupa epops	Common Hoopoe	I	AL/GL
		Coracias benghalensis	Indian Roller	I	OS/AL
		Ceryle rudis	Pied Kingfisher	C	WL
		Halcyon smyrnensis	White-throated Kingfisher	C	WL
		Alcedo atthis	Common Kingfisher	C	WL
		Halcyon pileata	Black-capped Kingfisher	C	WL
		Merops orientalis	Green Bee-eater	I	OS/AL
		Merops philippinus	Blue-tailed Bee- eater	I	OS/AL
		Centropus sinensis	Greater Coucal	C	OS
		Eudynamys scolopaceus	Asian Koel	O	OS
		Clamator jacobinus	Pied Cuckoo	I	OS
		Hierrococcyx varius	Common Hawk Cuckoo	O	OS
		Psittacula krameri	Rose-ringed Parakeet	F	Tr
		Athene brama	Spotted Owlet	C	OS/AL/Tr
		Columba livia	Rock Pigeon	G	AL/OS/GL
		Streptopelia decaocto	Eurasian Collared-Dove	G	AL/OS/GL
		Spilopelia senegalensis	Laughing Dove	G	AL/OS/GL
		Spilopelia chinensis	Spotted Dove	G	AL/OS/GL
		Cypsiurus balasiensis	Asian Palm- swift	I	Tr
		Apus melba	Alpine Swift	I	Tr/OS
		Gallinula chloropus	Eurasian Moorhen	C	WL
		Porphyrio Poliocephalus	Grey-headed Swamphen	C	WL
		Amaurornis phoenicurus	White-breasted Waterhen	C	WL
		Fulica atra	Eurasian Coot	C	WL
		Zapornia pusilla	Baillon’s Crake	C	WL
		Gallicrex cinerea	Watercock	O	WL
		Rostratula benghalensis	Greater Painted Snipe	O	WL
		Tringa totanus	Common Redshank	C	WL
		Gallinago gallinago	Common Snipe	C	WL
		Tringa glareola	Wood Sandpiper	I	WL
		Actitis hypoleucos	Common Sandpiper	I	WL
		Tringa stagnatilis	Marsh Sandpiper	I	WL
		Tringa ocropus	Green Sandpiper	I	WL
		Calidris minuta	Little Stint	I	WL
		Calidris temminickii	Temminick’s Stint	I	WL
		Hydrophasianus chirurgus	Pheasant-tailed Jacana	I	WL
		Burhinus indicus	Indian Stone-curlew	C	WL
		Charadrius dubius	Little Ringed Plover	I	WL
		Vanellus malabaricus	Yellow-wattled Lapwing	O	WL
		Vanellus indicus	Red-wattled Lapwing	O	WL
		Himantopus himantopus	Black-winged Stilt	I	WL
		Chlidonias hybrida	Whiskered Tern	C	WL
		Falco tinnunculus	Common Kestrel	C	AL/OS/GL
		Milvus migrans	Black Kite	C	AL/OS/WL/GL
		Elanus caeruleus	Black-winged Kite	C	AL/OS
		Hieraaetus pennatus	Booted Eagle	C	OS/Tr
		Accipiter badius	Shikra	C	AL/GL/Tr/OS
		Pernis ptilorhynchus	Oriental Honey Buzzard	C	Tr
		Clanga hastata	Indian Spotted Eagle	C	AL/Tr
		Haliastur indus	Brahminy Kite	C	WL/GL
		Circus aeruginosus	Western Marsh Harrier	C	OS/GL
		Anhinga melanogaster	Oriental Darter	C	WL
		Microcarbo niger	Little Cormorant	C	WL
		Phalacrocorax carbo	Great Cormorant	C	WL
		Phalacrocorax fuscicollis	Indian Cormorant	C	WL
		Lxobrychus sinensis	Yellow Bittern	C	WL
		Ardea cinerea	Grey Heron	C	WL
		Ardea purpurea	Purple Heron	C	WL
		Egretta garzetta	Little Egret	C	WL
		Bubulcus ibis	Cattle Egret	C	WL
		Ardea alba	Great Egret	C	WL
		Ardea intermedia	Intermediate Egret	C	WL
		Ardeola grayii	Indian Pond Heron	C	WL
		Nycticorax nycticorax	Black-crowned Night Heron	C	WL
		Butorides striata	Striated Heron	C	WL
		Egretta gularis	Western Reef-Heron	C	WL
		Threskiornis melanocephalus	Black-headed Ibis	C	WL
		Plegadis falcinellus	Glossy Ibis	C	WL
		Pseudibis papillosa	Red-naped Ibis	C	WL
		Platalea leucorodia	Eurasian Spoonbill	C	WL
		Pelecanus philippensis	Spot-billed Pelican	C	WL
		Anastomus oscitans	Asian Openbill	C	WL
		Mycteria leucocephala	Painted Stork	C	WL
		Ciconia episcopus	Asian Woolly-necked Stork	C	WL
		Coracina macei	Large Cuckooshrike	I	OS/Tr
		Oriolus kundoo	Indian Golden Oriole	O	OS
		Artamus fuscus	Ashy Woodswallow	I	OS/AL
		Tephrodornis pondicerianus	Common Woodshrike	I	Tr
		Lanius vittatus	Bay-backed Shrike	I	OS/AL
		Lanius cristatus	Brown Shrike	I	OS
		Lanius schach	Long-tailed Shrike	C	OS
		Dicrurus macrocercus	Black Drongo	I	GL/AL/OS
		Terpsiphone paradisi	Indian Paradise -flycatcher	I	Tr
		Dendrocitta vagabunda	Rufous Treepie	O	OS
		Corvus macrorhynchos	Indian Jungle Crow	O	OS/GL/WL
		Corvus splendens	House Crow	O	AL/OS/WL/GL
		Acridotheres tristis	Common Myna	F	AL/OS/GL
		Pastor roseus	Rosy Starling	F	AL/OS/GL
		Sturnia pagodarum	Brahminy Starling	F	Tr/OS
		Cecropis daurica	Red rumped Swallow	I	OS/AL
		Hirundo rustica	Barn Swallow	I	AL/WL
		Pycnonotus cafer	Red-vented Bulbul	F	OS/AL/GL
		Turdoides affinis	Yellow billed Babbler	I	OS/AL
		Turdoides malcolmi	Large Grey Babbler	I	OS/AL
		Prinia socialis	Ashy Prinia	I	AL/OS/GL
		Prinia inornata	Plain Prinia	I	AL/OS/GL
		Orthotomus sutorius	Common Tailorbird	I	AL/OS/GL
		Cisticola juncidis	Zitting Cisticola	I	AL/OS/GL
		Acrocephalus dumetorum	Blyth’s Reed Warbler	I	OS
		Eremopterix griseus	Ashy-crowned Sparrow Lark	I	OS/AL/WL
		Galerida cristata	Jerdon’s Bushlark	I	AL/OS/GL
		Alauda gulgula	Oriental Skylark	I	GL/AL/WL
		Muscicapa dauurica	Asian Brown flycatcher	I	Tr/OS
		Copsychus fulicatus	Indian Robin	I	AL/OS
		Copsychus saularis	Oriental Magpie Robin	I	AL/OS
		Saxicola caprata	Pied Bushchat	I	OS
		Cinnyris lotenius	Loten’s Sunbird	N	OS/GL
		Cinnyris asiaticus	Purple-rumped Sunbird	N	OS/GL
		Cinnyris asiaticus	Purple Sunbird	N	OS/GL
		Ploceus philippinus	Baya Weaver	G	OS
		Euodice malabarica	Indian Silverbill	G	AL/GL/OS
		Lonchura malacca	Tricoloured Munia	G	OS/GL
		Dicaeum concolor	Pale-billed Flowerpecker	N	OS
		Passer domesticus	House Sparrow	G	AL/GL
		Gymnoris xanthocollis	Yellow-throated Sparrow	G	OS
		Motacilla maderaspatensis	White-browed Wagtail	I	WL
		Anthus rufulus	Paddyfield Pipit	I	GL/AL

## Sheet: Indices
		CBS	KBS	MKBS	SBS	TBS
	Spot billed Pelican	0	54	54	129	666				CBS	KBS	MKBS	SBS	TBS
	Oriental Darter	6	0	8	53	98			Taxa_S	13	14	19	17	23
	Large egret	18	13	13	0	25			Individuals	442	438	515	2935	3655
	Intermediate Egret	13	32	32	0	40			Dominance_D	0.1216	0.1127	0.1034	0.1718	0.1639
	Little Egret	32	0	30	0	25			Shannon_H	2.292	2.391	2.544	2.3	2.233
	Cattle Egret	0	0	8	0	86			Evenness_e^H/S	0.761	0.7804	0.6702	0.587	0.4056
	Grey Heron	26	16	16	73	42			Menhinick	0.6183	0.6689	0.8372	0.3138	0.3804
	Indian Pond Heron	20	11	11	0	43
	Black-crowned Night Heron	69	18	18	186	196
	Purple Heron	8	7	7	0	11
	Painted Stork	48	48	87	0	275
	Openbill Stork	93	93	93	297	1182
	Glossy Ibis	9	0	4	0	29
	Red-naped Ibis	0	0	0	0	8
	Black-headed Ibis	68	68	68	197	272
	Eurasian Spoonbill	0	0	11	0	272
	Spot-billed Duck	0	14	4	115	8
	Lesser Whistling Duck	0	0	0	35	2
	Knob billed Duck	0	21	0	74	4
	Little cormorant	32	23	23	1094	205
	Indian cormorant	0	20	20		154
	Black winged Stilt	0	0	8	70	8
	Red wattled Lapwing	0	0	0	107	4
	Common Moorhen	0	0	0	130	0
	Pheasant tailed Jacana	0	0	0	44	0
	Purple Swamphen	0	0	0	141	0
	White breasted waterhen	0	0	0	41	0
	Little Grebe	0	0	0	149	0
